# Supplementary material
Source: PubMed Central journal article supplement (PMC5468513)

1 Supplemental Figure legends

2

3 **Supplementary Figure E1.** Complement components C5b-9, C4d and C1rs-  
4 C1inh levels in sinonasal tissue correlated moderately but significantly. Tissue  
5 homogenates from UT and NP were tested by ELISA and levels were normalized  
6 to total protein for C5b-9, C4d and C1rs-C1inh. Correlations were assessed  
7 using the nonparametric Spearman rank correlation coefficient.

8

9 **Supplementary Table E1.** Association between complement products and  
10 demographic and clinical factors. The patients with the top tertile of C1rs-C1inh,  
11 C4d, and C5b-9 in NP tissue were compared with those in the bottom tertile. Chi-  
12 square contingency tables for categorical variables and t-tests for continuous  
13 variables were performed.

14

15

16

17

**Table E1. Associations between complement products and demographic and clinical factors.**

|                                                                                              | <i>c5b-9</i>      |                    |                |                     | <i>C4</i>         |                    |                |                     | <i>C1rs-C1inh</i> |                    |                |                     |
|----------------------------------------------------------------------------------------------|-------------------|--------------------|----------------|---------------------|-------------------|--------------------|----------------|---------------------|-------------------|--------------------|----------------|---------------------|
|                                                                                              | <i>Lowest 1/3</i> | <i>Highest 1/3</i> | <i>P-value</i> | <i>Significance</i> | <i>Lowest 1/3</i> | <i>Highest 1/3</i> | <i>P-value</i> | <i>Significance</i> | <i>Lowest 1/3</i> | <i>Highest 1/3</i> | <i>P-value</i> | <i>Significance</i> |
| <b>Race</b><br><i>W/H/B/A/O</i>                                                              | 13/1/2/2/1        | 16/0/2/0/1         | 0.51           | ns                  | 13/0/3/2/1        | 12/4/2/0/1         | 0.18           | ns                  | 10/2/5/1/1        | 17/1/0/0/1         | 0.09           | ns                  |
| <b>Age,</b><br><i>Mean (Range)</i>                                                           | 45.7 (20-72)      | 47.7 (34-70)       | 0.57           | ns                  | 51.4 (27-74)      | 46.5 (26-71)       | 0.25           | ns                  | 50.7 (20-74)      | 44.5 (32-70)       | 0.09           | ns                  |
| <b>Gender</b>                                                                                | 9M/10F            | 11M/8F             | 0.52           | ns                  | 12M/7F            | 11M/8F             | 0.74           | ns                  | 6M/13F            | 13M/6F             | 0.05           | ns                  |
| <b>Atopy</b>                                                                                 | 9Y/6N/4U          | 10Y/6N/3U          | 0.91           | ns                  | 12Y/5N/2U         | 8Y/6N/5U           | 0.34           | ns                  | 9Y/5N/5U          | 6Y/7N/6U           | 0.60           | ns                  |
| <b>Skin Test</b><br><i>+, -, U</i>                                                           | 6/6/7             | 5/2/12             | 0.18           | ns                  | 9/3/7             | 3/2/14             | 0.06           | ns                  | 6/3/10            | 3/4/12             | 0.52           | ns                  |
| <b>Asthma</b>                                                                                | 16Y/3N            | 11Y/8N             | 0.07           | ns                  | 14Y/5N            | 7Y/12N             | 0.02           | *                   | 15Y/4N            | 8Y/11N             | 0.02           | *                   |
| <b>Steroid Dependence</b>                                                                    | 2Y/17N            | 0Y/19N             | 0.14           | ns                  | 2Y/17N            | 0Y/19N             | 0.15           | ns                  | 0Y/19N            | 1Y/18N             | 0.31           | ns                  |
| <b>Nasal Steroids 4 Weeks before Surgery</b>                                                 | 5Y/14N            | 8Y/11N             | 0.31           | ns                  | 8Y/11N            | 8Y/10N/1U          | 0.59           | ns                  | 8Y/10N/1U         | 5Y/14N             | 0.31           | ns                  |
| <b>Inhaled Steroids 4 Weeks before Surgery</b>                                               | 12Y/7N            | 8Y/11N             | 0.19           | ns                  | 10Y/9N            | 5Y/13N/1U          | 0.18           | ns                  | 11Y/7N/1U         | 7Y/12N             | 0.20           | ns                  |
| <b>Systemic Steroids 4 Weeks before Surgery</b>                                              | 8Y/11N            | 8Y/11N             | >0.99          | ns                  | 8Y/11N            | 5Y/13N/1U          | 0.39           | ns                  | 7Y/11N/1U         | 3Y/16N             | 0.17           | ns                  |
| <b>Antibiotics before Surgery</b>                                                            | 3Y/16N            | 0Y/19N             | 0.07           | ns                  | 2Y/17N            | 2Y/16N/1U          | 0.60           | ns                  | 3Y/15N/1U         | 1Y/18N             | 0.32           | ns                  |
| <b>Sinus CT Severity</b><br><i>Mild/Mild to moderate/Moderate to severe/Severe/No report</i> | 3/7/6/2/1         | 3/6/5/4/1          | 0.78           | ns                  | 0/7/3/8/1         | 4/9/3/2/1          | 0.10           | ns                  | 3/7/1/6/2         | 4/2/7/5/1          | 0.10           | ns                  |
| <b>Smoking Status</b><br><i>Never/Current/Former</i>                                         | 16/1/2            | 17/1/1             | 0.83           | ns                  | 15/1/3            | 14/2/3             | 0.83           | ns                  | 15/0/4            | 13/3/3             | 0.19           | ns                  |
| <b>Samter's Triad</b>                                                                        | 1Y/18N            | 2Y/17N             | 0.55           | ns                  | 0Y/19N            | 1Y/18N             | 0.31           | ns                  | 1Y/18N            | 1Y/18N             | >0.9           | ns                  |
| <b>History of ESS</b>                                                                        | 19Y/0N            | 18Y/1N             | 0.31           | ns                  | 17Y/2N            | 19Y/0N             | 0.15           | ns                  | 19Y/0N            | 17Y/2N             | 0.14           | ns                  |

F, Female; M, male; N, no; U, unknown; Y, yes; W, white; H, Hispanic; B, black; A, Asian; O, other; ESS, Endoscopic Sinus Surgery

Supplementary Table E1. Associations between complement products and demographic and clinical factors. The patients with the top tertile of C1rs-C1inh, C4d, and C5b-9 in NP tissue were compared with those in the bottom tertile. Chi-square contingency tables for categorical variables and t-tests for continuous variables were performed.

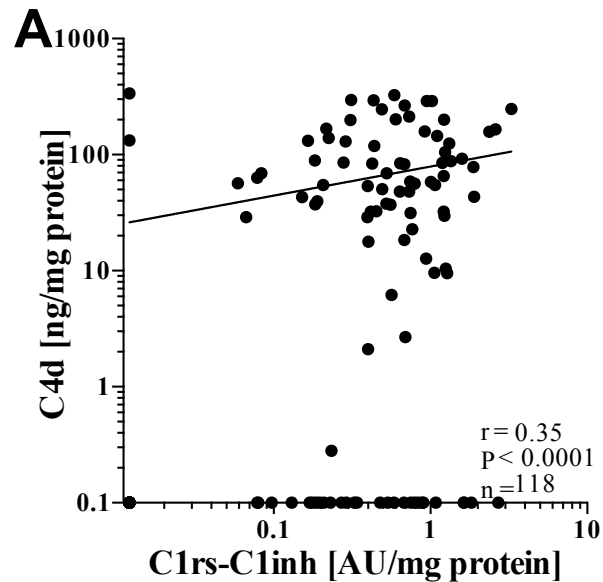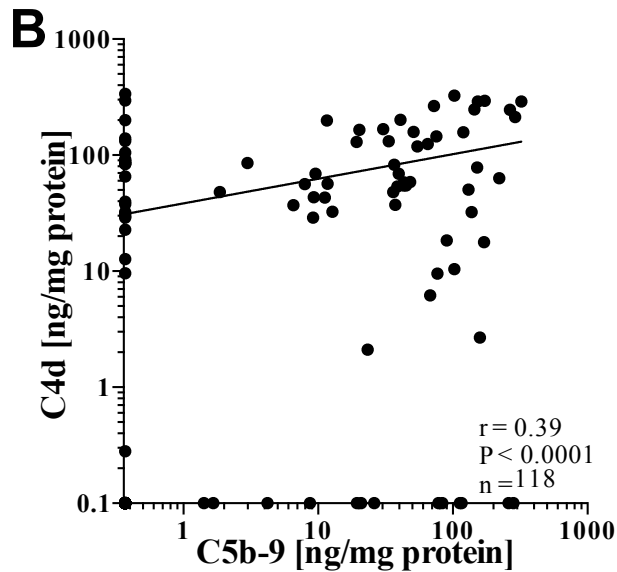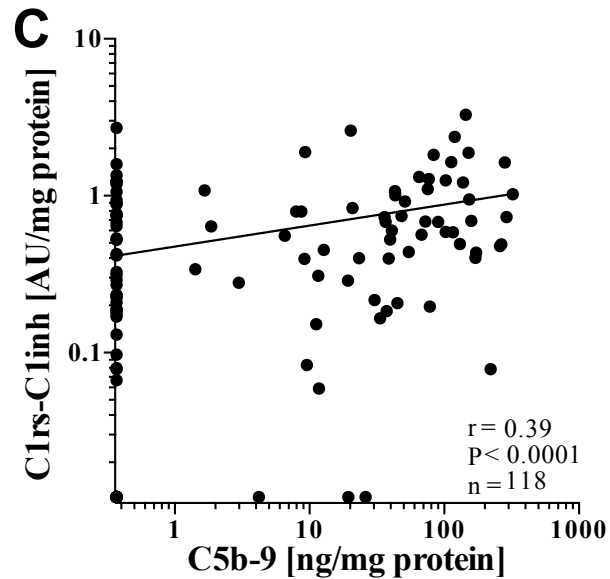

Supplement: NIHMS835860-supplement-01.pdf [file NIHMS835860-supplement-01.pdf]
